# Supplementary material for: Genome assembly forensics: finding the elusive mis-assembly
Source: PubMed Central journal article supplement (PMC2397507; doi:10.1186/gb-2008-9-3-r55), 2008-03-14
Supplement: gb-2008-9-3-r55-S1.pdf [file gb-2008-9-3-r55-S1.pdf]

**Table S1.** NCBI Taxonomy and RefSeq identifiers for the 16 genomes described in the Results section. All 16 genomes and corresponding sequencing reads were obtained from The Institute for Genomic Research or the J. Craig Venter Institute. All sequencing data is also available from the NCBI Trace Archive. Three finished genomes have not been released as of publication and are marked with 'NA' in the RefSeq column. Multiple RefSeq IDs are listed for genomes with multiple chromosomes and/or plasmids.

| <b>Genome</b>                                      | <b>Taxonomy ID</b> | <b>RefSeq ID</b>                    |
|----------------------------------------------------|--------------------|-------------------------------------|
| <i>Bacillus anthracis</i> Ames Ancestor            | 261594             | NC_007530<br>NC_007323<br>NC_007322 |
| <i>Brucella suis</i> 1330                          | 204722             | NC_004310<br>NC_004311              |
| <i>Campylobacter jejuni</i> RM1221                 | 195099             | NC_003912                           |
| <i>Chlamydomphila caviae</i> GPIC                  | 227941             | NC_003361<br>NC_004720              |
| <i>Coxiella burnetii</i> RSA 493                   | 227377             | NC_002971<br>NC_004704              |
| <i>Dehalococcoides ethenogenes</i> 195             | 243164             | NC_002936                           |
| <i>Fibrobacter succinogenes</i> S85                | 59374              | NA                                  |
| <i>Listeria monocytogenes</i> 4b F2365             | 265669             | NC_002973                           |
| <i>Mycoplasma capricolum</i> ATCC 27343            | 340047             | NC_007633                           |
| <i>Neorickettsia sennetsu</i> Miyayama             | 222891             | NC_007798                           |
| <i>Prevotella intermedia</i> 17                    | 246198             | NA                                  |
| <i>Pseudomonas syringae</i> pv. tomato str. DC3000 | 223283             | NC_004578<br>NC_004632<br>NC_004633 |
| <i>Staphylococcus aureus</i> subsp. aureus COL     | 93062              | NC_002951<br>NC_006629              |
| <i>Streptococcus agalactiae</i> 2603V/R            | 208435             | NC_004116                           |
| <i>Wolbachia pipientis</i> wMel                    | 163164             | NC_002978                           |
| <i>Xanthomonas oryzae</i> pv. <i>oryzae</i> PX099A | 360094             | NA                                  |
